# Supplementary material for: Test-retest reliability and convergent validity of (R)-[11C]PK11195 outcome measures without arterial input function
Source: Springer Nature journal article supplement (doi:10.1186/s13550-018-0455-8), 2018-11-29
Supplement: MOESM1 [file 16304888]

# Supplementary Material

*Plavén-Sigra et al.*

## Evaluation of 2TCM outcomes with vB fitted for each ROI

We also evaluated the reliability and convergent validity of 2TCM outcome measures, where vB had been fitted separately for each subject and ROI. 2TCM BP<sub>ND</sub> showed on average higher reliability and repeatability, compared to when fitting one vB for the entire brain (Supplementary Table 1). However, 2TCM V<sub>S</sub> and V<sub>T</sub> showed notably lower test-retest values with a vB fitted for each ROI. There were no to low correlations to remaining outcomes (BP<sub>ND</sub> from SRTM-CER, SRTM-SVCA, SRTMv-SVCA or SUV40-60 minutes, see Supplementary Figure 1).

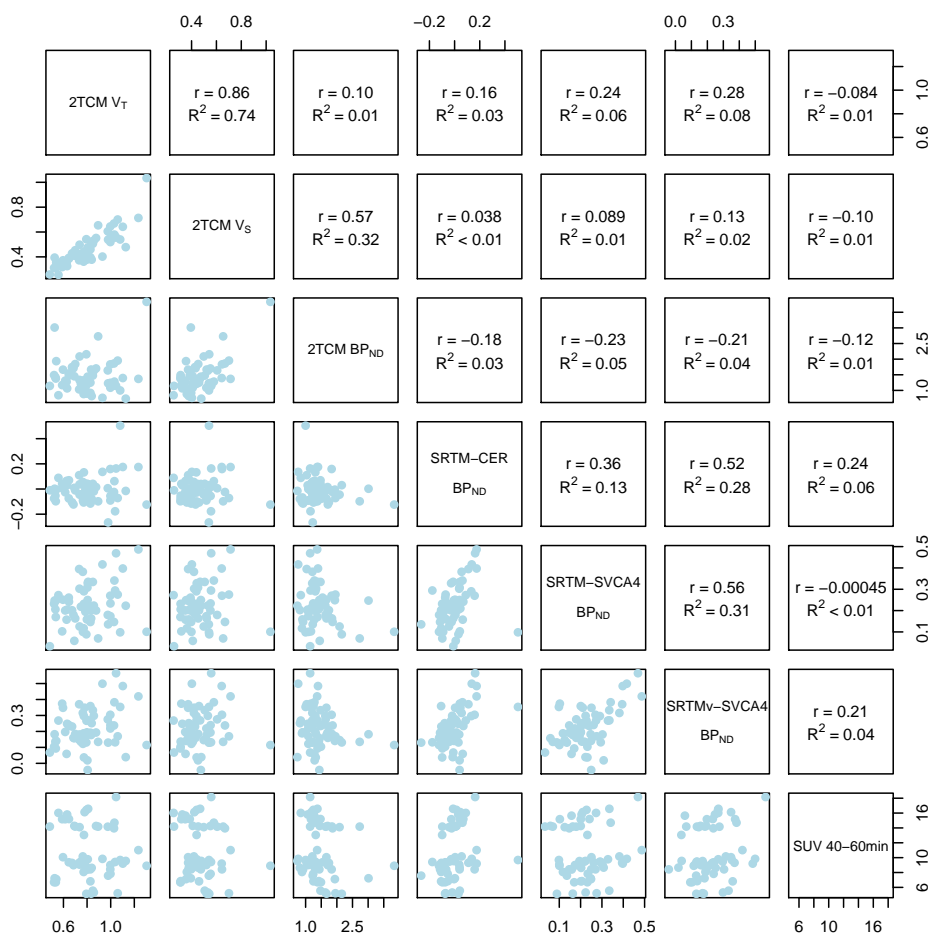

Figure 1: Relationships between all (R)-[<sup>11</sup>C]PK1195 outcome measures, where whole-blood contribution to ROI radioactivity (vB) have been fitted for each ROI. Values from both PET examinations and all regions have been pooled in each panel. Pearson's correlation coefficients ( $r$ ) and explained variance ( $R^2$ ) are presented in the upper diagonal.

Table 1: Test-retest metrics for BPND, VS and VT values derived using 2TCM while fitting vB for each ROI separately.

| Region      | Mean | SD   | ICC   | AbsVar% | SEM  | MD% |
|-------------|------|------|-------|---------|------|-----|
| <b>BPND</b> |      |      |       |         |      |     |
| FC          | 1.42 | 0.35 | 0.82  | 13      | 0.15 | 29  |
| GM          | 1.34 | 0.29 | 0.76  | 13      | 0.14 | 29  |
| HIP         | 1.70 | 0.92 | 0.74  | 35      | 0.46 | 76  |
| STR         | 1.46 | 0.49 | 0.11  | 30      | 0.46 | 87  |
| THAL        | 1.30 | 0.33 | 0.57  | 24      | 0.22 | 46  |
| <b>VS</b>   |      |      |       |         |      |     |
| FC          | 0.46 | 0.10 | 0.54  | 16      | 0.07 | 39  |
| GM          | 0.45 | 0.10 | 0.59  | 17      | 0.06 | 38  |
| HIP         | 0.49 | 0.20 | 0.03  | 34      | 0.20 | 113 |
| STR         | 0.47 | 0.12 | -0.02 | 31      | 0.12 | 70  |
| THAL        | 0.46 | 0.14 | 0.33  | 27      | 0.11 | 66  |
| <b>VT</b>   |      |      |       |         |      |     |
| FC          | 0.80 | 0.15 | 0.51  | 15      | 0.10 | 36  |
| GM          | 0.79 | 0.16 | 0.59  | 16      | 0.10 | 36  |
| HIP         | 0.81 | 0.24 | -0.01 | 26      | 0.24 | 81  |
| STR         | 0.80 | 0.16 | 0.22  | 23      | 0.14 | 49  |
| THAL        | 0.84 | 0.23 | 0.33  | 27      | 0.19 | 63  |
